# Supplementary material
Source: PubMed Central journal article supplement (PMC3129496)

# Supplemental Figure 1

A

|                                                                                                  | Oncomine Upregulated in hESC (855*) | HIF2A target gene (434*) | Combined ES genes and Nanog, Oct4, Sox2 and Myc targets (2371*) (Ben-Porath et al.,2008) | Consensus genes positively correlated with leukemic stem cell frequency (204*) (Somerville et al., 2009) |
|--------------------------------------------------------------------------------------------------|-------------------------------------|--------------------------|------------------------------------------------------------------------------------------|----------------------------------------------------------------------------------------------------------|
| Upregulatd in hESC (3169*) in our study                                                          | 528 (1.36 E-294)                    | 70 (2.97 E-6)            | 770 (2.42 E-196)                                                                         | 88 (7.47 E-37)                                                                                           |
| Cluster #5 (642*)                                                                                | 79 (4.32 E-29)                      | 36 (4.47 E-13)           | 111 (7.28 E-17)                                                                          | 10 (0.006)                                                                                               |
| Oncomine_Upregulate d in hESC (855*)                                                             | 855 (0)                             | 22 (0.0018)              | 360 (8.80 E-143)                                                                         | 3 (0.497)                                                                                                |
| Overlap between Oncomine_Upregulate d in hESC and our hESC upregulated genes (528*)              | 528 (0)                             | 13 (0.0028)              | 256 (4.90 E-176)                                                                         | 3 (1)                                                                                                    |
| Overlap between Oncomine_Upregulate d in hESC and cluster #5 of our hESC upregulated genes (79*) | 79 (2.10 E-84)                      | 7 (0.202)                | 31 (6.34 E-5)                                                                            | 2 (0.359)                                                                                                |

\* number of genes in the gene sets

B

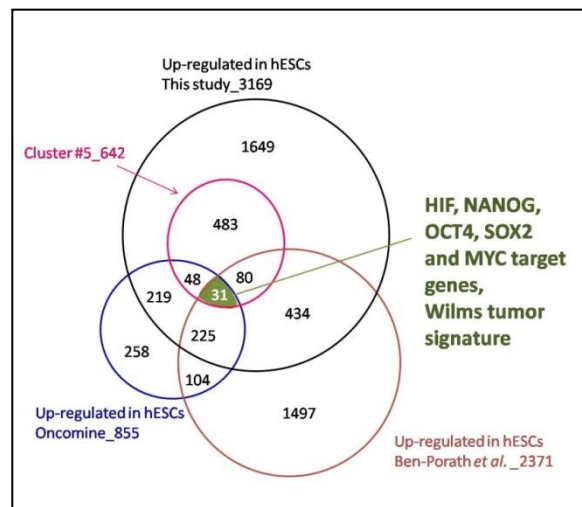

C

## List of the 31 genes overlapping between hESC signature defined by Oncomine and Ben-Porath et al. and our cluster #5

| Gene Symbol                    | Gene Name                                                              | Genes down-regulated by HIF1B siRNA under hypoxia in U251 cells (1598*) | HIF2A target gene (434*) | MYC targets (976*) (Ben-Porath et al.,2008) | Nanog, Oct4, Sox2 targets (1289*) (Ben-Porath et al.,2008) | Wilms_tumors_vs_Stratagene_Universal_Reference (3235*) (NextBio) |
|--------------------------------|------------------------------------------------------------------------|-------------------------------------------------------------------------|--------------------------|---------------------------------------------|------------------------------------------------------------|------------------------------------------------------------------|
| ABCB7                          | ATP-binding cassette, sub-family B (MDR/TAP), member 7                 | ABCB7                                                                   |                          |                                             | ABCB7                                                      | ABCB7                                                            |
| ADD2                           | adducin 2 (beta)                                                       |                                                                         |                          |                                             |                                                            |                                                                  |
| ATP1A2                         | ATPase, Na+/K+ transporting, alpha 2 (+) polypeptide                   |                                                                         |                          |                                             |                                                            | ATP1A2                                                           |
| C12orf11                       | chromosome 12 open reading frame 11                                    | C12orf11                                                                |                          |                                             |                                                            |                                                                  |
| C1orf38                        | chromosome 1 open reading frame 38                                     | C1orf38                                                                 |                          |                                             |                                                            |                                                                  |
| CER1                           | cerberus 1, cysteine knot superfamily, homolog (Xenopus laevis)        |                                                                         |                          |                                             | CER1                                                       |                                                                  |
| CYP26A1                        | cytochrome P450, family 26, subfamily A, polypeptide 1                 |                                                                         |                          |                                             |                                                            |                                                                  |
| DPYSL2                         | dihydropyrimidinase-like 2                                             | DPYSL2                                                                  | DPYSL2                   |                                             | DPYSL2                                                     | DPYSL2                                                           |
| EIF4B                          | eukaryotic translation initiation factor 4B                            | EIF4B                                                                   |                          |                                             | EIF4B                                                      | EIF4B                                                            |
| FGFR1                          | fibroblast growth factor receptor 1                                    | FGFR1                                                                   |                          |                                             | FGFR1                                                      | FGFR1                                                            |
| JARID2                         | jumonji, AT rich interactive domain 2                                  |                                                                         |                          | JARID2                                      | JARID2                                                     | JARID2                                                           |
| LTA4H                          | leukotriene A4 hydrolase                                               | LTA4H                                                                   |                          | LTA4H                                       |                                                            | LTA4H                                                            |
| NANOG                          | Nanog homeobox                                                         |                                                                         |                          |                                             | NANOG                                                      | NANOG                                                            |
| NMU                            | neuromedin U                                                           |                                                                         |                          |                                             | NMU                                                        |                                                                  |
| OAZ2                           | ornithine decarboxylase antizyme 2                                     |                                                                         |                          |                                             | OAZ2                                                       | OAZ2                                                             |
| PAICS                          | phosphoribosylaminoimidazole succinocarboxamide synthetase             |                                                                         |                          | PAICS                                       |                                                            | PAICS                                                            |
| PAPSS2                         | 3';-phosphoadenosine 5';-phosphosulfate synthase 2                     | PAPSS2                                                                  |                          |                                             | PAPSS2                                                     | PAPSS2                                                           |
| PIM2                           | pim-2 oncogene                                                         | PIM2                                                                    |                          | PIM2                                        | PIM2                                                       | PIM2                                                             |
| POLR1D                         | polymerase (RNA) I polypeptide D, 16kDa                                |                                                                         |                          | POLR1D                                      |                                                            | POLR1D                                                           |
| POU5F1                         | POU class 5 homeobox 1                                                 |                                                                         | POU5F1                   |                                             | POU5F1                                                     | POU5F1                                                           |
| RARRES2                        | retinoic acid receptor responder (tazarotene induced) 2                |                                                                         | RARRES2                  |                                             |                                                            | RARRES2                                                          |
| SFRS18                         | splicing factor, arginine/serine-rich 18                               |                                                                         |                          |                                             | SFRS18                                                     | SFRS18                                                           |
| SILV                           | silver homolog (mouse)                                                 |                                                                         |                          |                                             | SILV                                                       | SILV                                                             |
| SLC16A1                        | solute carrier family 16, member 1 (monocarboxylic acid transporter 1) |                                                                         |                          |                                             |                                                            | SLC16A1                                                          |
| SORL1                          | sortilin-related receptor, L(DLR class) A repeats-containing           |                                                                         |                          |                                             |                                                            |                                                                  |
| SPRY1                          | sprouty homolog 1, antagonist of FGF signaling (Drosophila)            | SPRY1                                                                   |                          |                                             | SPRY1                                                      | SPRY1                                                            |
| STC1                           | stanniocalcin 1                                                        | STC1                                                                    | STC1                     |                                             | STC1                                                       |                                                                  |
| SYNGR3                         | synaptogyrin 3                                                         | SYNGR3                                                                  |                          |                                             |                                                            | SYNGR3                                                           |
| TMEFF1                         | transmembrane protein with EGF-like and two follistatin-like domains 1 | TMEFF1                                                                  |                          |                                             |                                                            | TMEFF1                                                           |
| TNNT1                          | troponin T type 1 (skeletal, slow)                                     | TNNT1                                                                   |                          |                                             |                                                            | TNNT1                                                            |
| USO1                           | USO1 homolog, vesicle docking protein (yeast)                          |                                                                         |                          | USO1                                        | USO1                                                       |                                                                  |
| <b>Overlapping gene number</b> |                                                                        | <b>14</b>                                                               | <b>4</b>                 | <b>6</b>                                    | <b>17</b>                                                  | <b>22</b>                                                        |
| <b>p value</b>                 |                                                                        | <b>5.23 E-9</b>                                                         | <b>9.30 E-4</b>          | <b>4.96E-04</b>                             | <b>4.27E-13</b>                                            | <b>1.19 E-10</b>                                                 |

\* number of genes in the gene sets

## Supplemental Figure 2

A

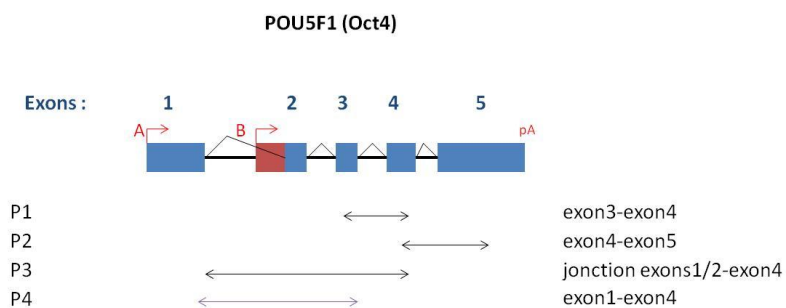

P4: Primers and amplicons used in Mueller et al., 2009

B

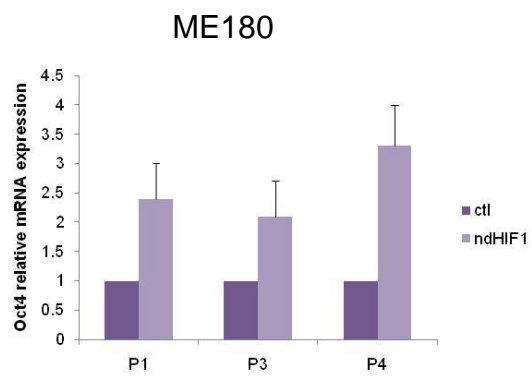

# Supplemental Figure 3

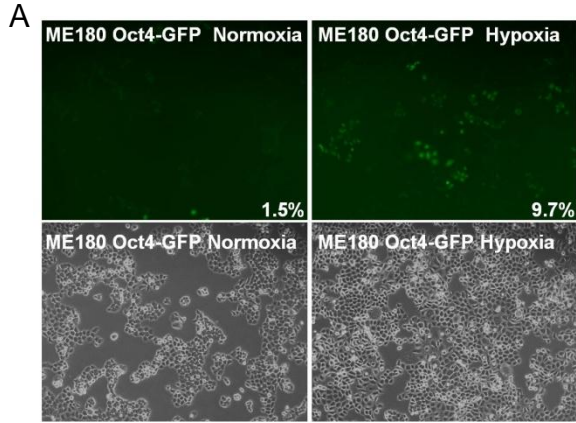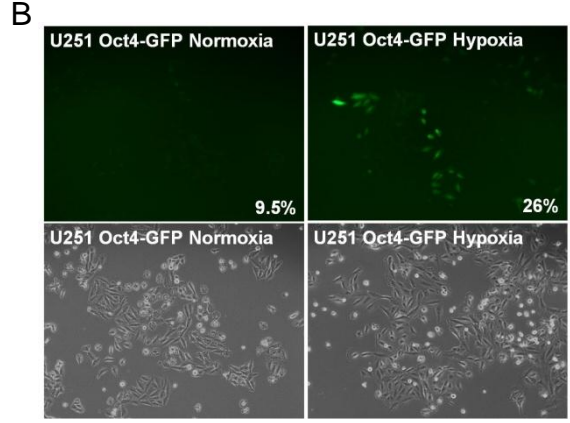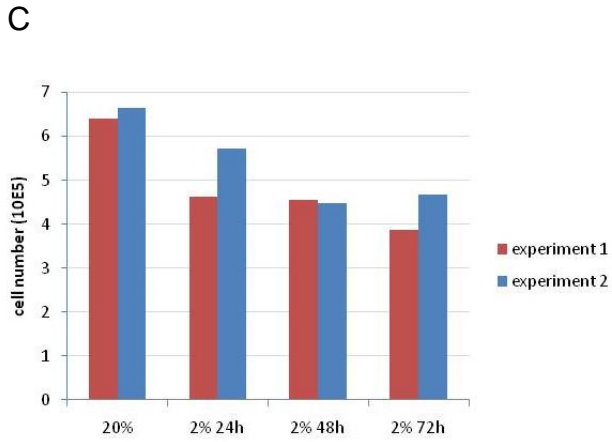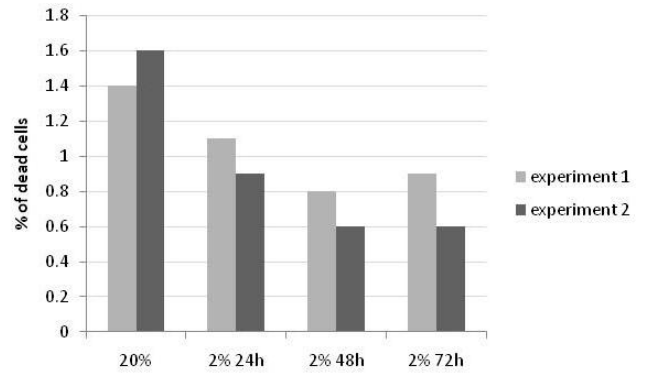

# Supplemental Figure 4

A

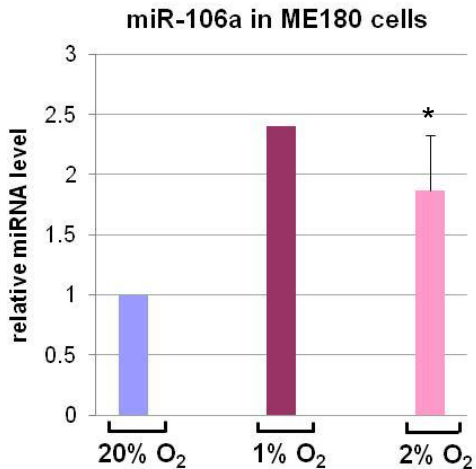

B

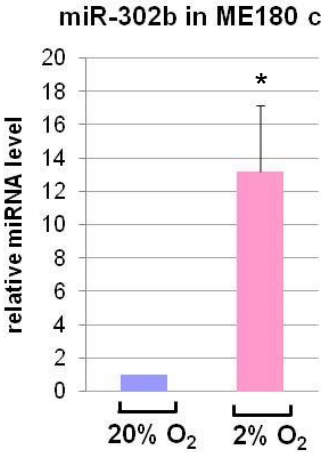

**Supplemental Figure 5**

ME180 Oct4-GFP

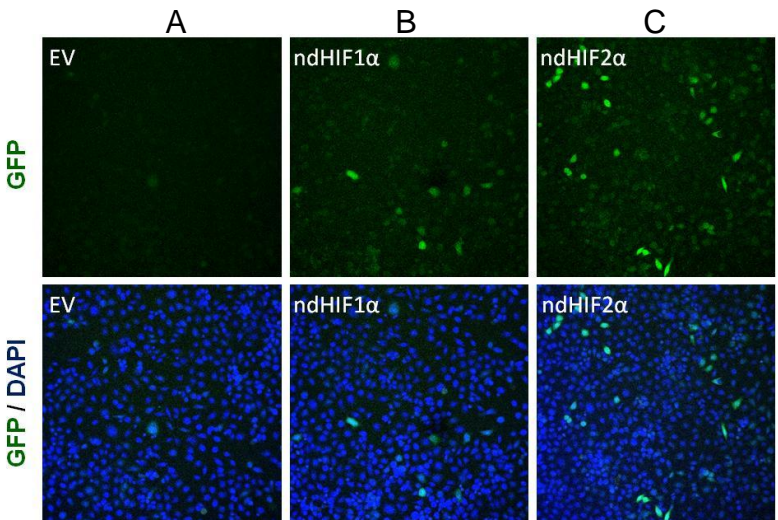

**D** ME180 Oct4-GFP

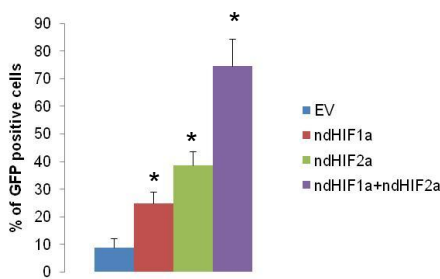

U251 Oct4-GFP

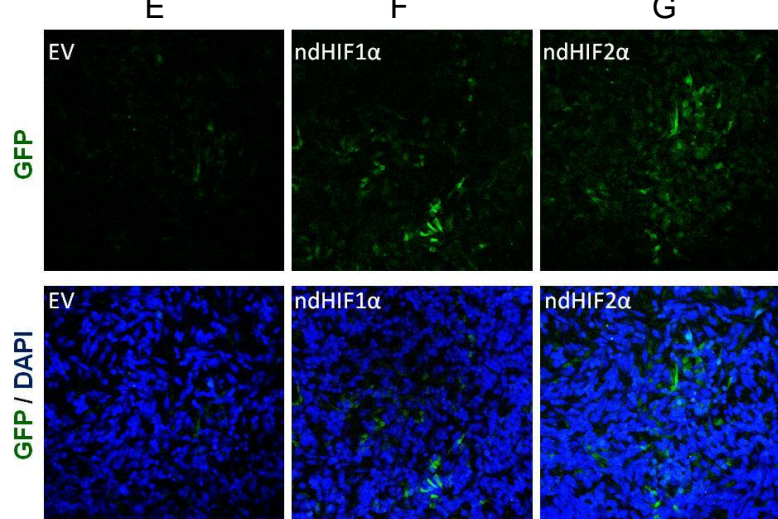

**H** U251 Oct4-GFP

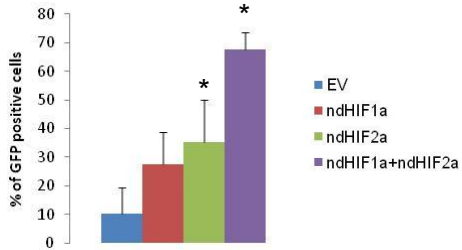

**I**

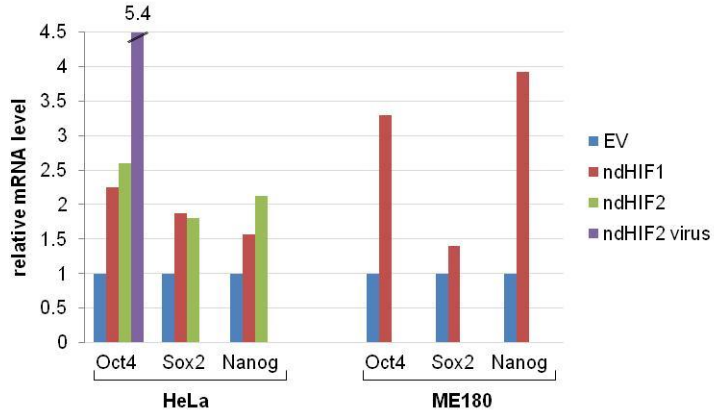

# Supplemental figure 6

A

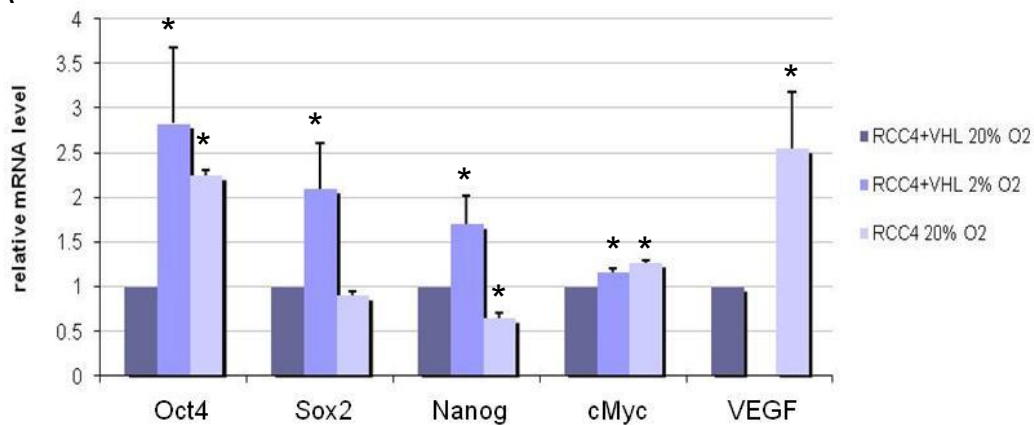

B

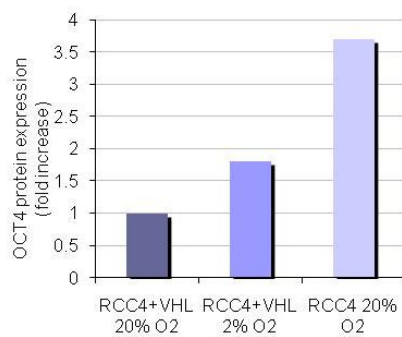

C

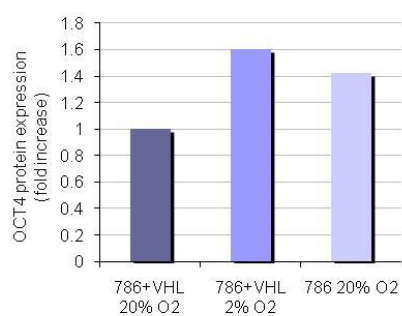

D

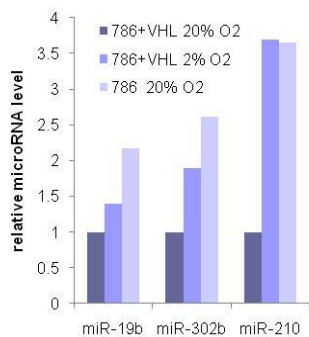

E

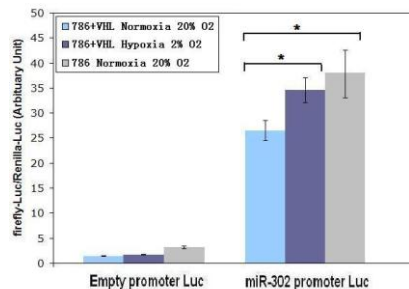

# Supplemental figure 7

## A. HIF qPCR in ME180

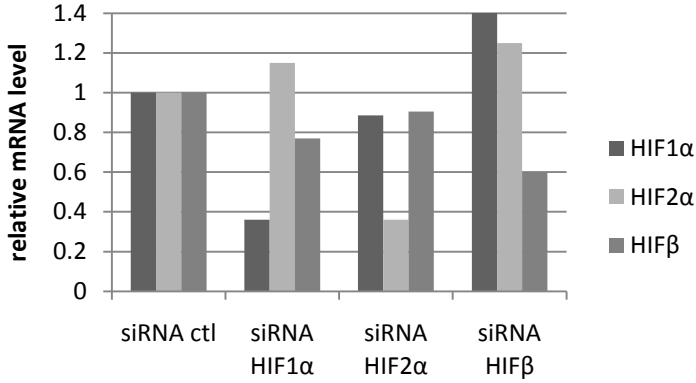

## B. ME180

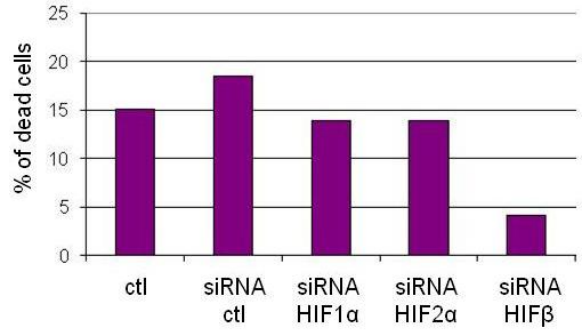

## C. Profiling in HCT116

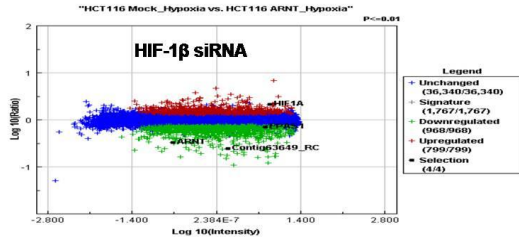

### Subunit fold change

HIF1α -1.43  
 HIF2α 2.13  
 HIFβ -3.08

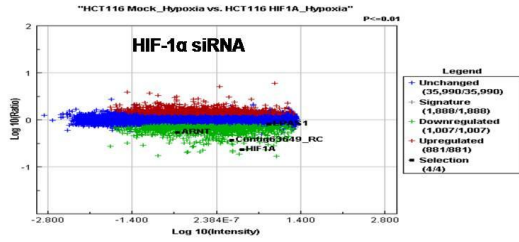

### Subunit fold change

HIF1α -4.38  
 HIF2α -1.26  
 HIFβ -1.87

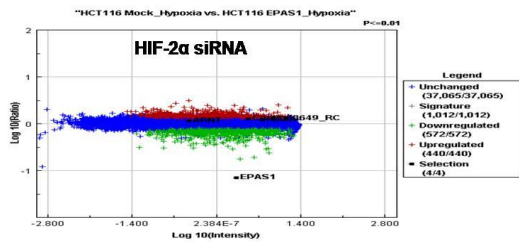

### Subunit fold change

HIF1α 1.18  
 HIF2α -14.45  
 HIFβ 1.14

## D.

| Primary Sequence Name | Entrez Gene ID | Fold change (RCC4-pBABE HIF1A siRNA vs. RCC4-pBABE Mock) | Fold Change (RCC4-VHL Hypoxia vs. RCC4-VHL Normoxia) | AceView Link                                                                                                                                                                                                                            |
|-----------------------|----------------|----------------------------------------------------------|------------------------------------------------------|-----------------------------------------------------------------------------------------------------------------------------------------------------------------------------------------------------------------------------------------|
| TAF9B                 | 51616          | 2.49                                                     | -2.018935                                            | <a href="http://www.ncbi.nlm.nih.gov/IEB/Research/AceView/av.cgi?exdb=AceView&amp;db=36a&amp;term=taf9b&amp;submit=Go">http://www.ncbi.nlm.nih.gov/IEB/Research/AceView/av.cgi?exdb=AceView&amp;db=36a&amp;term=taf9b&amp;submit=Go</a> |
| AREG                  | 374            | 1.44                                                     | -2.177243                                            | <a href="http://www.ncbi.nlm.nih.gov/IEB/Research/AceView/av.cgi?exdb=AceView&amp;db=36a&amp;term=areg&amp;submit=Go">http://www.ncbi.nlm.nih.gov/IEB/Research/AceView/av.cgi?exdb=AceView&amp;db=36a&amp;term=areg&amp;submit=Go</a>   |
| SGK3                  | 56260          | 1.34                                                     | -1.504768                                            | <a href="http://www.ncbi.nlm.nih.gov/IEB/Research/AceView/av.cgi?exdb=AceView&amp;db=36a&amp;term=sgk3&amp;submit=Go">http://www.ncbi.nlm.nih.gov/IEB/Research/AceView/av.cgi?exdb=AceView&amp;db=36a&amp;term=sgk3&amp;submit=Go</a>   |



Supplemental Figure 8

A

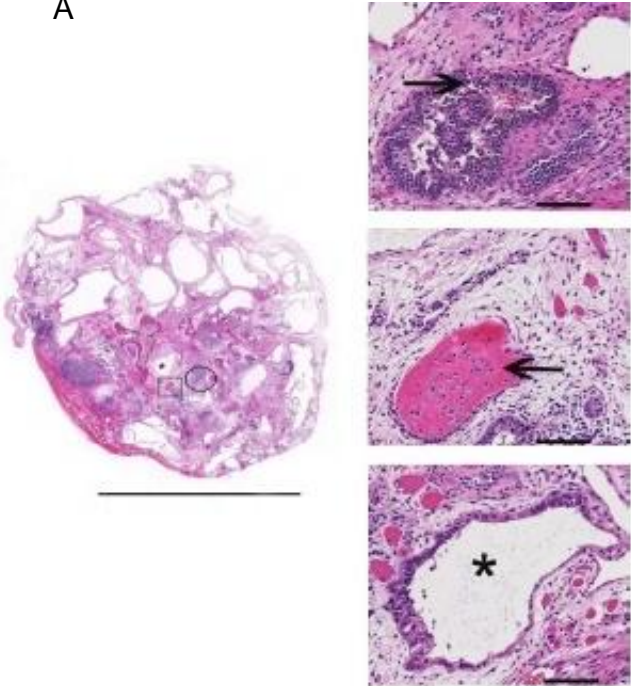

B

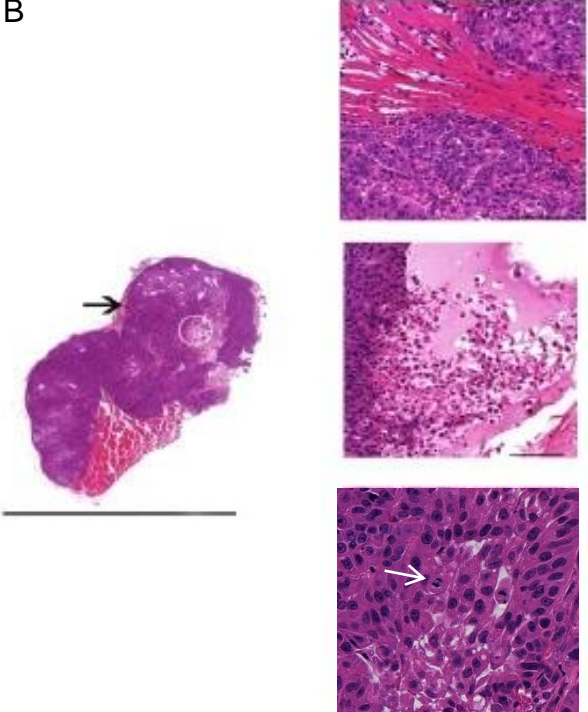



**Supplemental Figure 9**

**Skin  
HIF1 $\alpha$**

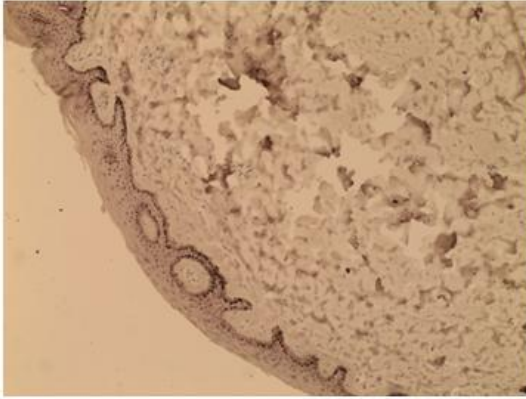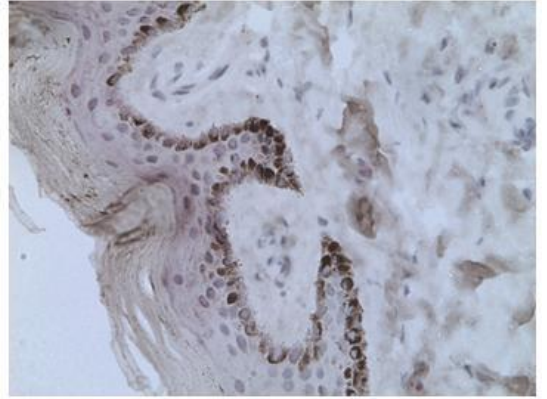

**hESC  
Nanog**

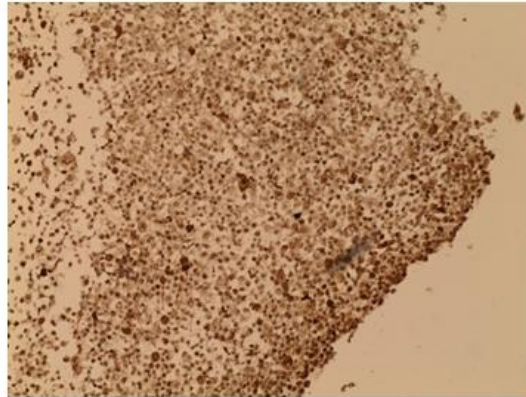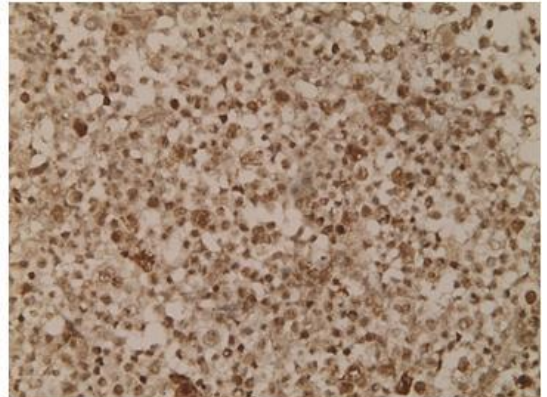

**hESC  
Oct4**

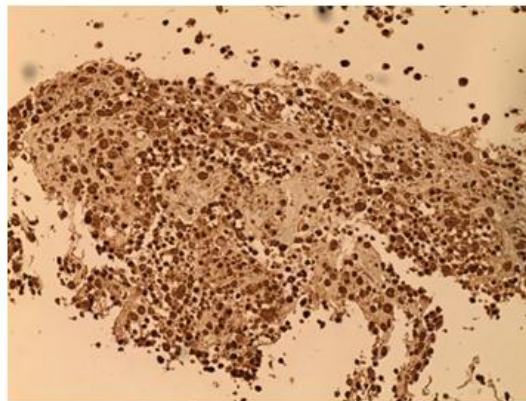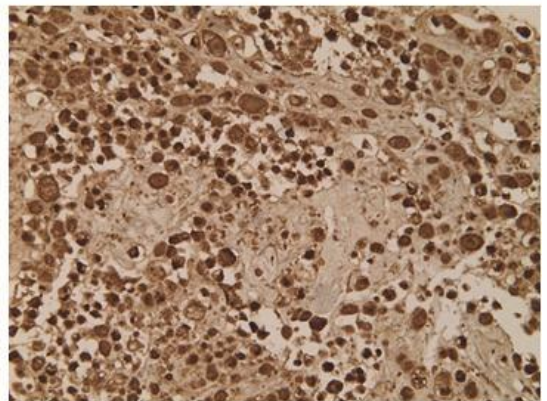

## Supplemental Figure 10

### A Prostate 09-066C

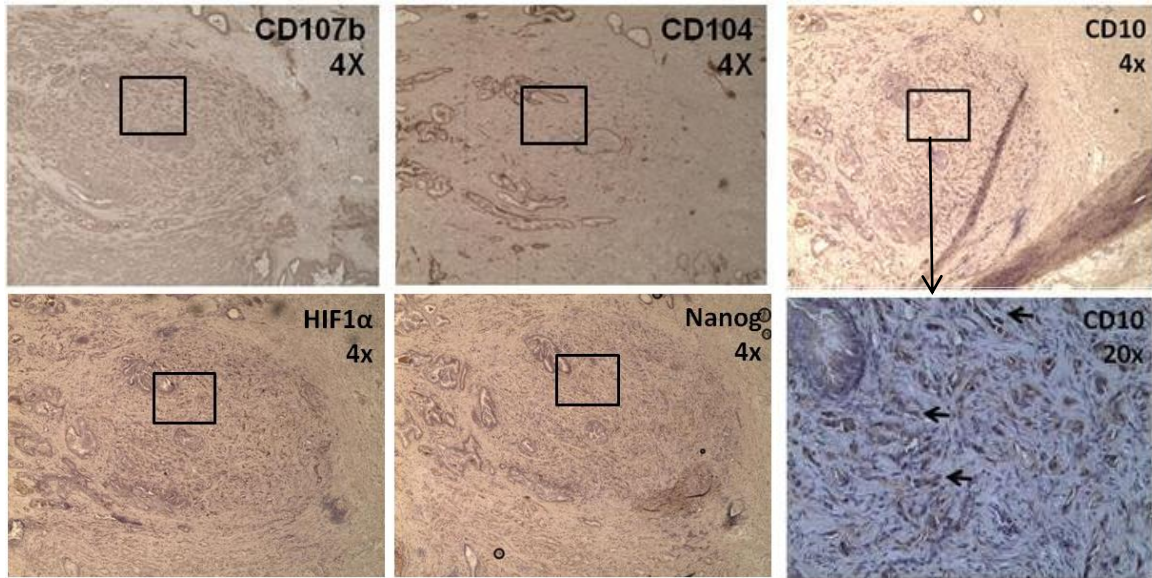

### B Prostate 07-020C

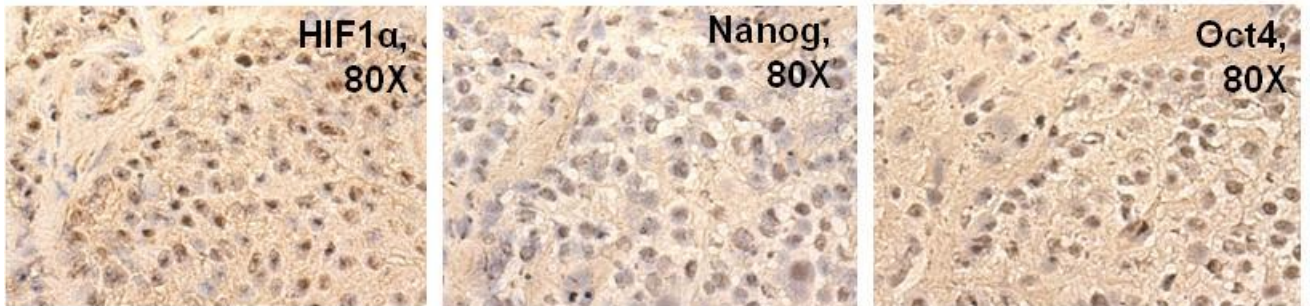



Supplemental figure 11

glioma NP07-3-SC1

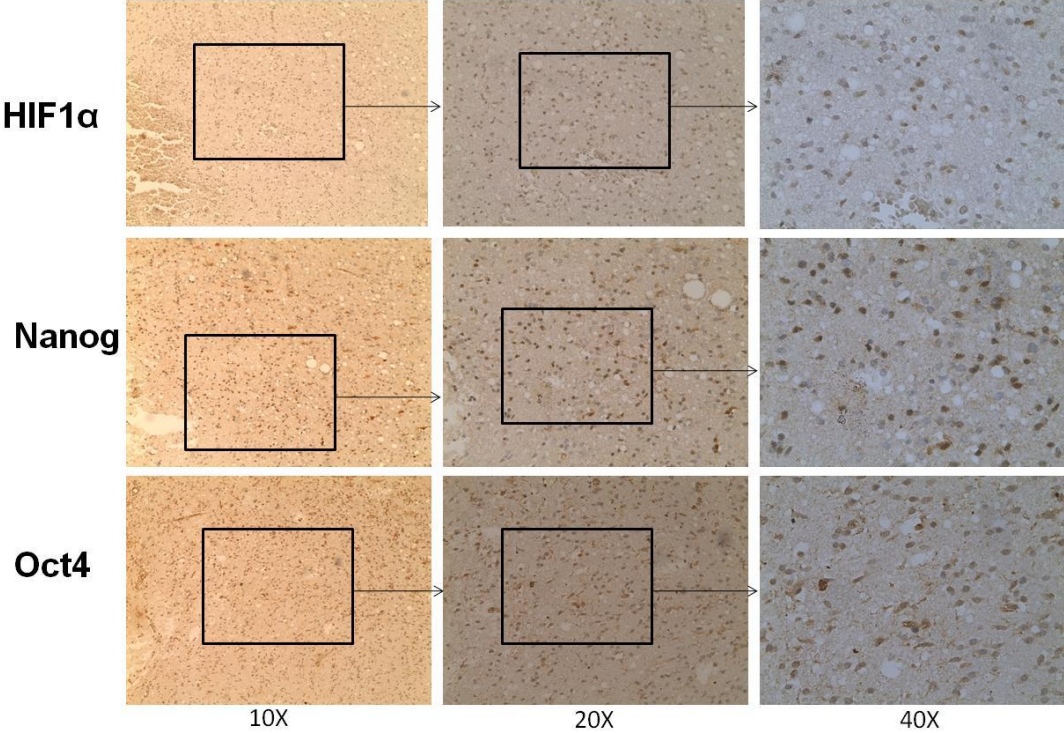

# Supplemental figure 12

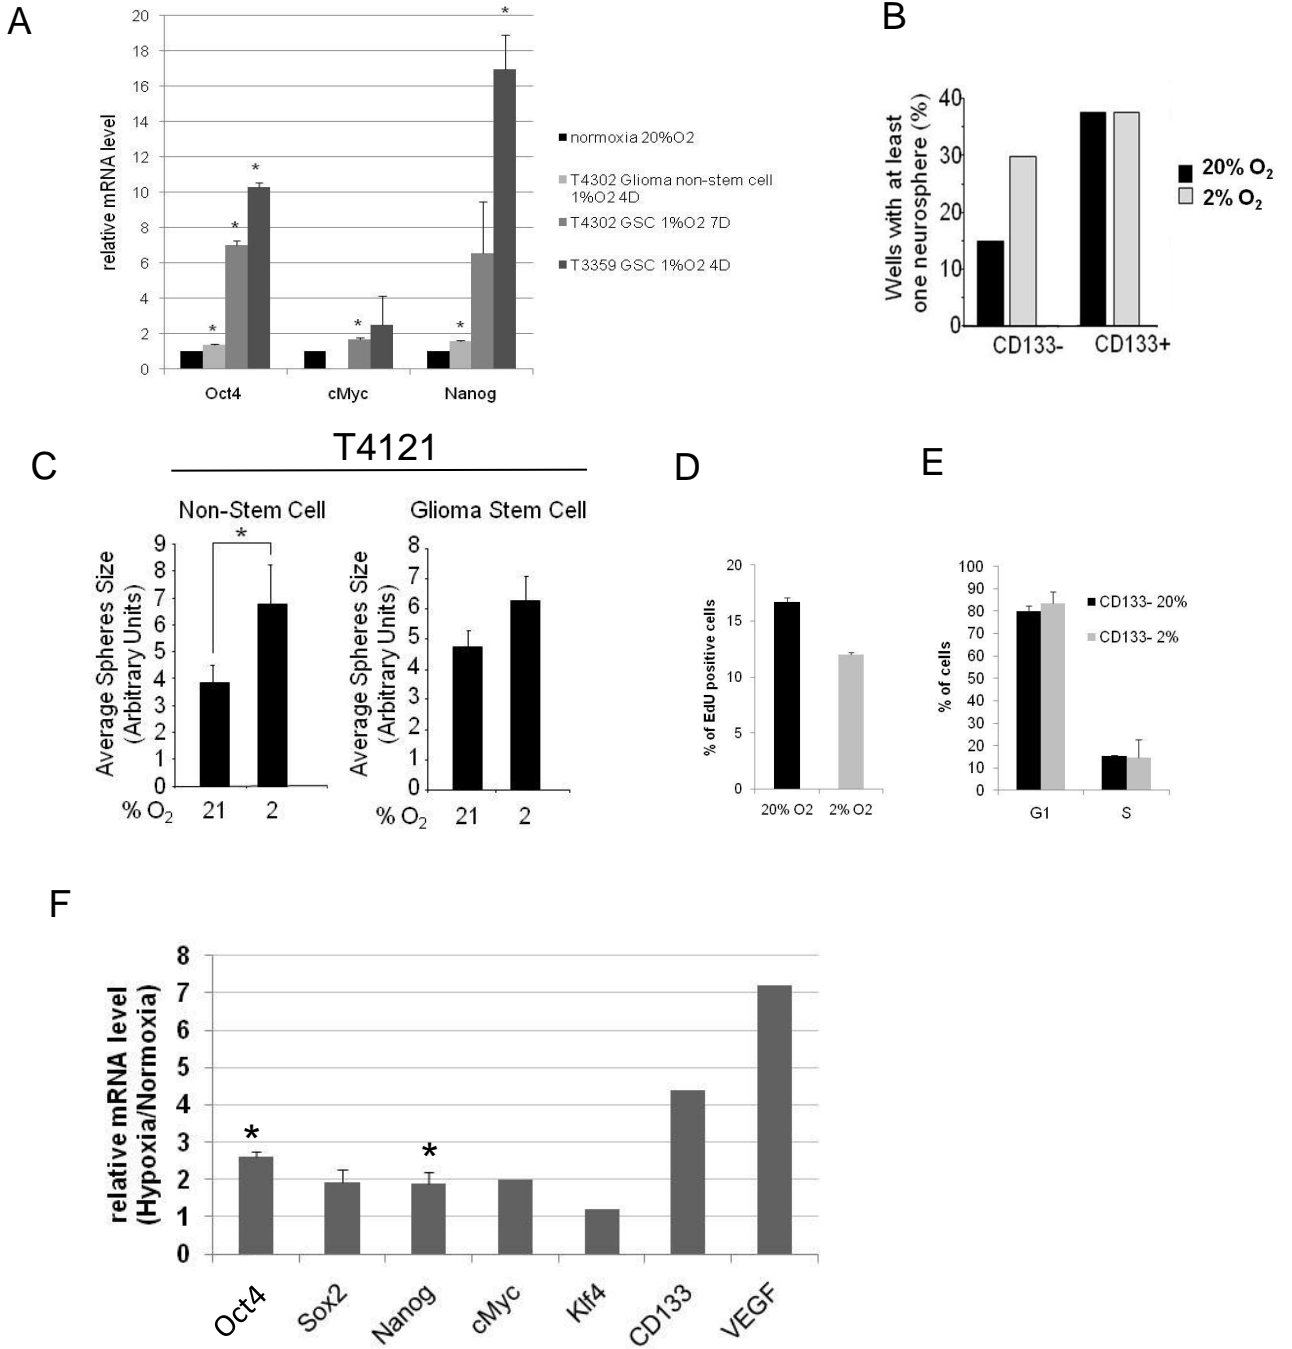

Supplement: NIHMS292968-supplement-4.pdf [file NIHMS292968-supplement-4.pdf]
